# Supplementary material
Source: publisher site journal article supplement (https://e-cmh.org/upload/media/cmh-2023-0506-Supplementary-Figure-2.pdf)
Supplement: Supplementary file 1 [file cmh-2023-0506-Supplementary-Figure-2.pdf]

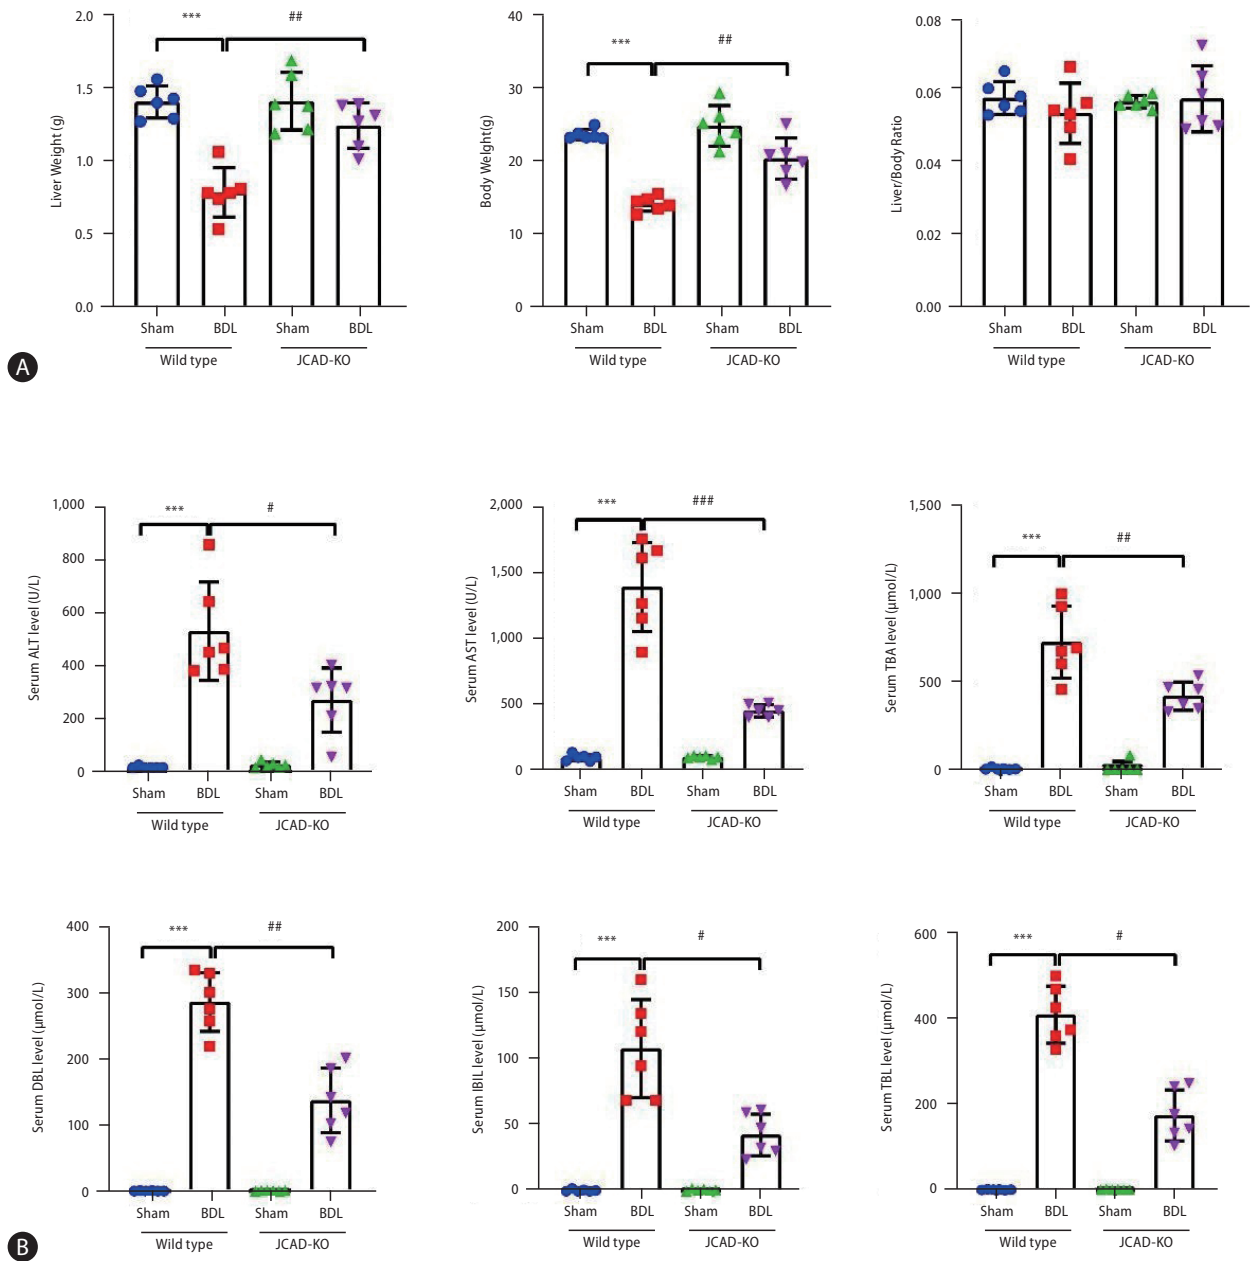

**Supplementary Figure 2.** JCAD depletion partially rescued the liver damage by bile duct ligation. (A) The liver weight, body weight, liver/body weight ratios of WT-Sham, WT-BDL, JCAD-KO-Sham and JCAD-KO-BDL mice (n=6). (B) Increased AST, ALT, TBA, DBL, IBL and TBL levels in WT-BDL mice, while alleviated in JCAD-KO-BDL mice. Data are expressed as mean±SD, n=6 in each group. \*\*\*\*\*, P<0.05, 0.01, and 0.001 vs. WT-Sham mice; ###, ###, ### P<0.05, 0.01, and 0.001 vs. WT-BDL mice.
